# Supplementary material for: Parent-Reported Developmental Regression in Autism: Epilepsy, IQ, Schizophrenia Spectrum Symptoms, and Special Education
Source: Springer Nature journal article supplement (doi:10.1007/s10803-016-3004-1), 2017-01-10
Supplement: MOESM1 [file 11991124]

Supplemental Table A: Differences between High IQ (IQs≥70) Regressed (HIQR) and High IQ Non-Regressed (HIQnR) Youth for Select Variables

| Variables | HIQR (*n*=24) | HIQnR (*n*=104) | statistic | *p*= | ESa |
| --- | --- | --- | --- | --- | --- |
| MEDICAL HISTORY |  |  |  |  |  |
| Epilepsy/seizure disorder (F/%) | 5 (20.8%) | 5 (4.8%) | 6.95 | **<.01b** | 5.21 |
| TREATMENT |  |  |  |  |  |
| Current special education (F/%) | 18 (75.0%) | 59 (56.7) | 2.72 | .10b | 2.29 |
| ASD SYMPTOM SEVERITY |  |  |  |  |  |
| Communication Deficits (P) | 5.29 (2.77) | 3.64 (2.79) | 2.62 | **0.01c** | 0.59 |
| Communication Deficits (T) | 3.37 (3.11) | 3.28 (2.60) | 0.13 | 0.90c | 0.03 |
| PSYCHIATRIC SYMPTOM SEVERITY |  |  |  |  |  |
| Schizophrenia spectrum disorder (P) | 9.79 (5.23) | 6.2 (5.40) | 2.96 | **<0.01c** | 0.68 |
| PSYCHIATRIC SYMPTOM IMPAIRMENT (F/%) |  |  |  |  |  |
| Schizophrenia (P) | 6 (27.3%) | 11 (12.2%) | 3.11 | 0.08b | 2.69 |
| Schizophrenia (T) | 5 (29.4%) | 12 (18.2%) | 1.05 | 0.31b | 1.88 |

NOTE: Significant *p* values (*p*<.025) are highlighted in **bold**. ASD=autism spectrum disorder; P=parent; T=Teacher.

a ES=Cohen’s *d* for continuous variables and Odds Ratio for binary variables.

b chi-square test

c *t* test

Supplemental Table B: Schizophrenia Spectrum Disorder (SSD) symptoms endorsed for developmentally regressed vs. non-regressed youth with ASD.

|  | Mothers’ Ratings | | | | | Teachers’ Ratings | | | | |
| --- | --- | --- | --- | --- | --- | --- | --- | --- | --- | --- |
| **SSD Symptom**  **(truncated version of item)** | **Regressed**  **F (%)** | **Non-regressed**  **F (%)** | ***χ*2** | ***p*** | OR | **Regressed**  **F (%)** | **Non-regressed**  **F (%)** | ***χ*2** | ***p*** | OR |
| Schizoid Personality |  |  |  |  |  |  |  |  |  |  |
| Prefers to be alone | 20 (44.4%) | 43 (31.9%) | 2.35 | .125 | 1.71 | 14 (37.8%) | 29 (28.7%) | 1.05 | .305 | 1.51 |
| Little interest in relationships | 23 (51.1%) | 46 (34.1%) | 4.14 | .042 | 2.02 | 16 (43.2%) | 33 (32.7%) | 1.32 | .250 | 1.57 |
| Emotionally cold | 10 (22.2%) | 20 (14.8%) | 1.33 | .248 | 1.64 | 11 (29.7%) | 25 (24.8%) | 0.35 | .555 | 1.29 |
| Schizophrenia |  |  |  |  |  |  |  |  |  |  |
| Hallucinations, delusions |  |  |  |  |  |  |  |  |  |  |
| Strange ideas | 1 (2.2%) | 8 (6.0%) | a | .290 | 0.36 | 4 (10.8%) | 7 (7.0%) | a | .340 | 1.61 |
| Hears voices | 2 (4.4%) | 3 (2.2%) | a | .370 | 2.03 | 2 (5.4%) | 3 (3.0%) | a | .410 | 1.85 |
| Disorganized thinking |  |  |  |  |  |  |  |  |  |  |
| Ideas don’t make sense | 9 (20.0%) | 26 (19.4%) | 0.01 | .930 | 1.04 | 10 (27.0%) | 20 (20.0%) | 0.78 | .377 | 1.48 |
| Illogical thoughts | 5 (11.1%) | 13 (9.7%) | a | .490 | 1.16 | 5 (13.5%) | 15 (15.0%) | 0.05 | .827 | 0.89 |
| **Disorganized behavior** |  |  |  |  |  |  |  |  |  |  |
| **Extremely strange behaviors** | **14 (31.1%)** | **20 (14.9%)** | **5.74** | **.017** | **2.57** | 11 (29.7%) | 21 (21.0%) | 1.15 | .284 | 1.59 |
| **Does extremely odd things** | **14 (31.1%)** | **20 (14.9%)** | **5.74** | **.017** | **2.57** | 12 (32.4%) | 23 (23.0%) | 1.26 | .261 | 1.61 |
| **Disorg. emotions / avolition** |  |  |  |  |  |  |  |  |  |  |
| Inappropriate emotions | 16 (35.6%) | 29 (21.6%) | 3.47 | .063 | 2.00 | 13 (35.1%) | 25 (25.0%) | 1.38 | .239 | 1.63 |
| **Little interest in doing things** | **11 (24.4%)** | **14 (10.4%)** | **5.49** | **.019** | **2.77** | **8 (21.6%)** | **8 (8.0%)** | **a** | **.033** | **3.17** |

a Fisher’s exact test reported when expected cell count <5.

Supplemental Table C: Percentage of Youth with *Child and Adolescent Symptom Inventory-4R* Ratings of Impairment for Regressed (R) and Non-Regressed (NR) Youtha

|  | Mothers’ Ratings | | | | | Teachers’ Ratings | | | | |
| --- | --- | --- | --- | --- | --- | --- | --- | --- | --- | --- |
| Characteristic | R% | NR% | *Chi* | *p*= | OR | R% | NR% | *Chi* | *p*= | OR |
| ADHD: Inattention | 65% | 61% | 0.16 | 0.69 | 1.17 | 66% | 58% | 0.62a | 0.43 | 1.40 |
| Conduct disorder | 37% | 24% | 2.54 | 0.11 | 1.86 | 17% | 8% | 1.57a | 0.21 | 2.17 |
| Oppositional defiant disorder | 39% | 33% | 0.53 | 0.47 | 1.31 | 39% | 41% | 0.03a | 0.86 | 0.93 |
| Generalized anxiety | 37% | 27% | 1.42 | 0.23 | 1.58 | 36% | 41% | 0.19a | 0.67 | 0.83 |
| Social anxiety | 26% | 32% | 0.53 | 0.47 | 0.74 | 43% | 34% | 0.81a | 0.37 | 1.48 |
| Separation anxiety | 10% | 5% | 1.22 | 0.27 | 2.08 | NA | NA | NA | NA | NA |
| Schizoid | 34% | 21% | 2.77 | 0.10 | 1.97 | NA | NA | NA | NA | NA |
| Major depressive episode | 24% | 19% | 0.43 | 0.51 | 1.34 | 48% | 38% | 0.07a | 0.80 | 1.12 |
| Manic episode | 23% | 17% | 0.54 | 0.46 | 1.39 | 32% | 30% | 1.06a | 0.30 | 1.12 |
| Schizophrenia spectrum | 34% | 14% | 7.66 | **0.01** | 3.22 | 45% | 21% | 6.35a | **0.01** | 3.02 |

NOTE: Significant *p* values (*p*<.025) are highlighted in **bold**. ADHD=attention-deficit/hyperactivity disorder.

a Impairment ratings were available for a subsample of youth: Mothers’ ratings (R=41; NR=116), teachers’ ratings (R=33; NR=85).

Supplemental Table D: Differences Between Regressed (R) and Non-Regressed (NR) Youth: *Full Inclusion* Parsing Strategy

| Variables | R (*n*=77) | NR (*n*=136) | statistic | *p*= | ESa |
| --- | --- | --- | --- | --- | --- |
| CHILD |  |  |  |  |  |
| Male (F/%) | 65 (84.4%) | 107 (78.7%) | 1.04b | .307 | 1.47 |
| Age (*M/SD*) | 10.6 (3.2) | 10.7 (3.5) | 0.22c | .827 | -0.03 |
| European-American (F/%) | 61 (79.2%) | 120 (88.2%) | 3.13b | .077 | 0.51 |
| IQ <70 (F/%) | 27 (37.0%) | 24 (18.8%) | 8.69b | **.013** | 2.54 |
| HOME |  |  |  |  |  |
| Maternal education level (*M/SD*) | 4.6 (1.2) | 4.8 (1.2) | 1.02c | .308 | -0.14 |
| Income level (*M/SD*) | 4.5 (1.3) | 4.3 (1.3) | -1.14c | .257 | 0.18 |
| Single parent (F/%) | 13 (16.9%) | 18 (13.5%) | 0.44b | .510 | 1.30 |
| Family history psychopathology (F/%) | 47 (61.0%) | 100 (73.5%) | 3.59b | .058 | 0.56 |
| MEDICAL HISTORY |  |  |  |  |  |
| Ever hospitalized (F/%) | 37 (48.1%) | 40 (29.4%) | 7.40b | **.007** | 2.22 |
| Number of medical conditions (*M/SD*) | 1.2 (1.1) | 0.9 (0.9) | -2.07c | .040 | 0.29 |
| Any medical conditions | 50 (64.9%) | 79 (58.1%) | 0.97b | .326 | 1.34 |
| Number of pregnancy comps. (*M/SD*) | 0.6 (1.0) | 0.4 (0.7) | -1.96c | .052 | 0.26 |
| Any pregnancy comps. | 30 (39.0%) | 38 (28.6%) | 2.40b | .121 | 1.60 |
| Number of prior pregnancies (*M/SD*) | 1.2 (1.1) | 1.1 (1.0) | -1.07c | .286 | 0.16 |
| Epilepsy/seizure disorder (F/%) | 14 (18.2%) | 8 (5.9%) | 8.03b | **.005** | 3.56 |
| TREATMENT |  |  |  |  |  |
| Early intervention (F/%) | 46 (65.7%) | 70 (57.9%) | 1.15b | .284 | 1.40 |
| Current special education (F/%) | 68 (88.3%) | 93 (68.4%) | 10.58b | **.001** | 3.49 |
| Degree of social integration (*M/SD*) | 2.2 (1.4) | 1.8 (1.5) | -2.20c | .029 | 0.32 |
| Ever psychotropic medication (F/%) | 37 (48.1%) | 58 (42.6%) | 0.58b | .446 | 1.24 |
| Current psychotropic medication (F/%) | 32 (41.6%) | 57 (41.9%) | 0.00b | .960 | 0.99 |

NOTE: For this parsing strategy, all youth whom parents indicated had regressed (whether or not they indicated age of regression and type of skill) were classified as R. Significant *p* values (*p*<.025) are highlighted in **bold**.

a ES= Cohen’s *d* for continuous variables and Odds Ratio for binary variables.

b chi-square test

c *t* test

Supplemental Table E: Mean (SD) Severity of Autism Spectrum Disorder (ASD) Symptoms in Regressed (R) and Non-Regressed (NR) Youth: *Full Inclusion* Parsing Strategy

| Variables | R | NR | *t* | *p*= | ESa |
| --- | --- | --- | --- | --- | --- |
| SEVERITY of ASD: Parent ratings | (*n*=75) | (*n*=135) |  |  |  |
| Social Deficits | 6.4 (3.2) | 5.6 (3.4) | -1.69 | .093 | .25 |
| Communication Deficits | 5.8 (3.4) | 4.6 (3.5) | -2.35 | **.020** | .34 |
| Perseverative Behaviors | 5.7 (3.2) | 4.8 (3.0) | -1.89 | .060 | .27 |
| SEVERITY of ASD: Teacher ratings | (*n*=61) | (*n*=100) |  |  |  |
| Social Deficits | 7.1 (3.8) | 6.0 (3.6) | -1.82 | .071 | .29 |
| Communication Deficits | 5.7 (4.0) | 4.1 (3.5) | -2.60 | .**010** | .41 |
| Perseverative Behaviors | 4.6 (3.2) | 4.3 (3.2) | -0.67 | .502 | .11 |

NOTE: For this parsing strategy, all youth whom parents indicated had regressed (whether or not they indicated age of regression and type of skill) were classified as R. Significant *p* values (*p*<.025) are highlighted in **bold**.

a ES= effect size (Cohen’s *d*).

Supplemental Table F: Mean (SD) Mothers’ and Teachers’ *Child and Adolescent Symptom Inventory-4R* Symptom Severity Ratings of Regressed (R) and Non-Regressed (NR) Youth: *Full Inclusion* Parsing Strategy

| Characteristic | Mothers’ Ratings | | | | | Teachers’ Ratings | | | | |
| --- | --- | --- | --- | --- | --- | --- | --- | --- | --- | --- |
| R (*n*=76) | NR (*n*=135) | *t* | *p*= | ESa | R (*n*=62) | NR (*n*=102) | *t* | *p*= | ESa |
| ADHD: Inattention | 18.4 (6.4) | 15.5 (7.1) | -2.90 | **.004** | .42 | 15.9 (7.3) | 13.8 (6.9) | -1.85 | .066 | .30 |
| ADHD: Hyper-impulsive | 11.3 (7.1) | 11.0 (7.2) | -0.27 | .785 | .04 | 9.1 (6.5) | 9.6 (7.3) | 0.48 | .629 | -.08 |
| Conduct disorder | 1.8 (2.6) | 2.2 (3.7) | 0.76 | .446 | -.12 | 1.3 (2.3) | 1.6 (3.2) | 0.66 | .513 | -.11 |
| Oppositional defiant | 7.8 (5.7) | 8.7 (6.2) | 1.03 | .303 | -.15 | 6.9 (5.6) | 7.7 (6.8) | 0.81 | .420 | -.13 |
| Generalized anxiety | 9.4 (5.5) | 7.5 (5.2) | -2.55 | **.011** | .35 | 7.8 (4.3) | 8.0 (4.7) | 0.28 | .777 | -.05 |
| Social anxiety | 2.7 (2.7) | 3.0 (2.9) | 0.85 | .396 | -.13 | 2.3 (2.7) | 2.2 (2.7) | -0.26 | .795 | .04 |
| Separation anxiety | 3.0 (3.6) | 2.1 (3.8) | -1.73 | .085 | .26 | NA | NA | NA | NA | NA |
| Major depressive episode | 6.0 (5.1) | 4.5 (5.1) | -2.05 | .042 | .30 | 4.6 (3.7) | 4.3 (3.7) | -0.52 | .607 | .08 |
| Manic episode | 4.7 (4.6) | 3.4 (4.7) | -1.83 | .068 | .27 | 7.2 (4.9) | 6.4 (5.0) | -1.00 | .320 | .16 |
| Schizophrenia | 3.5 (3.0) | 2.8 (3.1) | -1.61 | .109 | .23 | 4.0 (3.8) | 3.1 (3.3) | -1.47 | .144 | .23 |
| Schizophrenia spectrum | 8.3 (5.1) | 6.6 (5.6) | -2.02 | .044 | .30 | NA | NA | NA | NA | NA |

NOTE: For this parsing strategy, all youth whom parents indicated had regressed (whether or not they indicated age of regression and type of skill) were classified as R. ADHD=attention-deficit/hyperactivity disorder. Significant *p* values (*p*<.025) are highlighted in bold.

a ES=effect size (Cohen’s *d*).
